# Supplementary material for: Response of Blood Pressure to Renal Denervation Is Not Associated With Genetic Variants
Source: PubMed Central journal article supplement (PMC11654447; doi:10.1161/hypertensionaha.124.23393), 2024-11-21
Supplement: hyp-82-118-s002.pdf [file hyp-82-118-s002.pdf]

# **RESPONSE OF BLOOD PRESSURE TO RENAL DENERVATION IS NOT ASSOCIATED WITH GENETIC VARIANTS**

Short title: Genetics and renal denervation

Christian Delles<sup>1</sup>, Roland E. Schmieder<sup>2</sup>, Rónán Daly<sup>3</sup>, Dennis Kannenkeril<sup>2</sup>, Agnes Bosch<sup>2</sup>, Lucas Lauder<sup>4,5</sup>, Michael Kunz<sup>4,5</sup>, Michael Böhm<sup>4</sup>, Graham Hamilton<sup>3</sup>, Raphael S. Schmieder<sup>6</sup>, Axel Schmid<sup>6</sup>, Pawel Herzyk<sup>3</sup>, Felix Mahfoud<sup>4,5,7</sup>

<sup>1</sup> School of Cardiovascular and Metabolic Health, University of Glasgow, Glasgow, UK

<sup>2</sup> Department of Nephrology and Hypertension, University Hospital Erlangen, Friedrich-Alexander University Erlangen-Nürnberg, Erlangen, Germany

<sup>3</sup> Glasgow Polyomics, Wolfson Wohl Cancer Research Centre, University of Glasgow, Glasgow, UK

<sup>4</sup> Department of Internal Medicine III, Cardiology, Angiology, Intensive Care Medicine, Saarland University Hospital, Homburg, Germany

<sup>5</sup> Department of Cardiology, University Heart Center Basel, University Hospital Basel, Switzerland

<sup>6</sup> Institute of Radiology, University Hospital Erlangen, Friedrich-Alexander University Erlangen-Nürnberg, Erlangen, Germany

<sup>7</sup> Institute for Medical Engineering and Science, Massachusetts Institute of Technology, Cambridge, Massachusetts, United States of America

## Reference

1. McLaren W, Gil L, Hunt SE, Riat HS, Ritchie GR, Thormann A, Flicek P, Cunningham F. The Ensembl Variant Effect Predictor. *Genome Biol.* 2016;17:122. doi: 10.1186/s13059-016-0974-4

**Table S1. Blood Pressure Changes in Responders and Non-responders.**

|                                                                  | <b>Responder<br/>N=134</b> | SD   | <b>Non-<br/>Responder<br/>N=134</b> | SD   | p-value |
|------------------------------------------------------------------|----------------------------|------|-------------------------------------|------|---------|
| <b>Excess <math>\Delta</math> SBP 6months<br/>(24 h amb)</b>     | -13.3                      | 9.9  | 11.9                                | 10.4 | < 0.005 |
| <b><math>\Delta</math>SBP 6 months (measured)<br/>(24 h amb)</b> | -23.3                      | 15.9 | 1.4                                 | 11.0 | < 0.005 |
| <b><math>\Delta</math>DBP 6 months (measured)<br/>(24 h amb)</b> | -12.6                      | 10.7 | 0.4                                 | 6.5  | < 0.005 |

The table displays changes in systolic and diastolic 24-h ambulatory blood pressure between baseline and 6-month follow-up. “Excess  $\Delta$  SBP” indicates the change beyond the mean response predicted from the regression between baseline systolic 24-h ambulatory blood pressure and change in systolic 24-h ambulatory blood pressure as shown in Supplementary Figure 1. All blood pressure data are given in mmHg.

**Table S2. Gene Ontology Analysis of Biological Processes**

| <b>TermID</b> | <b>Name</b>                                                     | <b>Value</b> | <b>LogSize</b> | <b>Frequency</b> | <b>Uniqueness</b> | <b>Dispensability</b> |
|---------------|-----------------------------------------------------------------|--------------|----------------|------------------|-------------------|-----------------------|
| GO:0001578    | microtubule bundle formation                                    | -2.557601319 | 2.130333768    | 0.749273093      | 0.866510269       | 0.16839598            |
| GO:0003356    | regulation of cilium beat frequency                             | -1.395205374 | 1.255272505    | 0.095057034      | 0.996834665       | 0.03159701            |
| GO:0006631    | fatty acid metabolic process                                    | -1.595757421 | 2.5132176      | 1.817266831      | 0.896054559       | 0.57852323            |
| GO:0006814    | sodium ion transport                                            | -1.383989392 | 2.33243846     | 1.196600313      | 0.975434712       | 0.21830706            |
| GO:0006869    | lipid transport                                                 | -1.311475129 | 2.547774705    | 1.968239767      | 0.974970761       | 0.30077163            |
| GO:0007155    | cell adhesion                                                   | -7.29787228  | 2.983626287    | 5.379109819      | 0.991598902       | 0.00936298            |
| GO:0007156    | homophilic cell adhesion via plasma membrane adhesion molecules | -13.33321815 | 2.225309282    | 0.933795571      | 0.877424654       | 0                     |
| GO:0098742    | cell-cell adhesion via plasma-membrane adhesion molecules       | -9.512082148 | 2.423245874    | 1.476179826      | 0.872965657       | 0.7579406             |
| GO:0007411    | axon guidance                                                   | -1.807508371 | 2.352182518    | 1.252516216      | 0.722875682       | 0.17852266            |
| GO:0097485    | neuron projection guidance                                      | -1.963880967 | 2.354108439    | 1.258107806      | 0.722752135       | 0.80069499            |
| GO:0007600    | sensory perception                                              | -2.83161275  | 2.996511672    | 5.541265936      | 0.883969371       | 0.69684887            |
| GO:0007608    | sensory perception of smell                                     | -1.322728146 | 2.668385917    | 2.600089465      | 0.892663232       | 0.14056467            |
| GO:0009653    | anatomical structure morphogenesis                              | -2.938394497 | 3.351409752    | 12.55312011      | 0.925304434       | 0.26820696            |
| GO:0009812    | flavonoid metabolic process                                     | -1.646707498 | 1.113943352    | 0.067099083      | 0.98032039        | 0.07086141            |
| GO:0009888    | tissue development                                              | -2.253802682 | 3.248708736    | 9.90829792       | 0.927511008       | 0.39465115            |
| GO:0030030    | cell projection organization                                    | -3.040118462 | 3.086715664    | 6.821740103      | 0.894692413       | 0.22293536            |
| GO:0030198    | extracellular matrix organization                               | -4.953042285 | 2.445604203    | 1.554462089      | 0.911033889       | 0.00750789            |
| GO:0031589    | cell-substrate adhesion                                         | -2.024693316 | 2.267171728    | 1.028852606      | 0.882556953       | 0.68680608            |
| GO:0032501    | multicellular organismal process                                | -1.354313588 | 3.797475288    | 35.07045404      | 1                 | 0                     |
| GO:0033627    | cell adhesion mediated by integrin                              | -1.786550303 | 1.568201724    | 0.201297249      | 0.897014375       | 0.50826741            |

|            |                                                         |              |             |             |             |            |
|------------|---------------------------------------------------------|--------------|-------------|-------------|-------------|------------|
| GO:0035082 | axoneme assembly                                        | -1.928377211 | 2.017033339 | 0.575933796 | 0.79513772  | 0.66311786 |
| GO:0070286 | axonemal dynein complex assembly                        | -1.478533131 | 1.62324929  | 0.2292552   | 0.809597406 | 0.86464515 |
| GO:0035239 | tube morphogenesis                                      | -1.653996177 | 2.833147112 | 3.802281369 | 0.867013151 | 0.47445673 |
| GO:0042632 | cholesterol homeostasis                                 | -1.416129424 | 1.959041392 | 0.503243122 | 0.939791288 | 0.40698589 |
| GO:0055092 | sterol homeostasis                                      | -1.36108365  | 1.963787827 | 0.508834713 | 0.939772934 | 0.87702424 |
| GO:0043062 | extracellular structure organization                    | -5.154760453 | 2.447158031 | 1.560053679 | 0.910999413 | 0.18338927 |
| GO:0044782 | cilium organization                                     | -1.643586862 | 2.58546073  | 2.147170655 | 0.806026183 | 0.61976467 |
| GO:0120036 | plasma membrane bounded cell projection organization    | -3.164799825 | 3.068927612 | 6.547752181 | 0.792650874 | 0.76194985 |
| GO:0045005 | DNA-templated DNA replication maintenance of fidelity   | -1.82548774  | 1.763427994 | 0.318720644 | 0.942114254 | 0.06805186 |
| GO:0006261 | DNA-templated DNA replication                           | -1.46357861  | 2.164352856 | 0.810780586 | 0.940562128 | 0.83731654 |
| GO:0045229 | external encapsulating structure organization           | -5.257152128 | 2.44870632  | 1.56564527  | 0.910965036 | 0.18331013 |
| GO:0045494 | photoreceptor cell maintenance                          | -2.683208091 | 1.643452676 | 0.240438381 | 0.910204183 | 0          |
| GO:0050877 | nervous system process                                  | -1.506538796 | 3.172894698 | 8.320286289 | 0.884701516 | 0.69845132 |
| GO:0050982 | detection of mechanical stimulus                        | -1.656842666 | 1.748188027 | 0.307537464 | 0.99245936  | 0.09531722 |
| GO:0051056 | regulation of small GTPase mediated signal transduction | -2.285095629 | 2.485721426 | 1.705435026 | 0.996428395 | 0          |
| GO:0051606 | detection of stimulus                                   | -1.531562044 | 2.831869774 | 3.791098188 | 0.991780683 | 0.07764458 |
| GO:0052697 | xenobiotic glucuronidation                              | -3.517071973 | 0.903089987 | 0.039141132 | 0.872936192 | 0.00529997 |
| GO:0052695 | cellular glucuronidation                                | -2.465287681 | 1.322219295 | 0.111831805 | 0.87425109  | 0.89656342 |
| GO:0052696 | flavonoid glucuronidation                               | -3.449915026 | 0.77815125  | 0.027957951 | 0.881164603 | 0.84706013 |
| GO:0070254 | mucus secretion                                         | -1.392972199 | 1.204119983 | 0.083873854 | 0.929228402 | 0.10375709 |
| GO:0072359 | circulatory system development                          | -1.813585354 | 2.967547976 | 5.18340416  | 0.874253573 | 0.35219795 |
| GO:0098609 | cell-cell adhesion                                      | -2.904448711 | 2.743509765 | 3.092149407 | 0.871604849 | 0.67863669 |
| GO:1904683 | regulation of metalloendopeptidase activity             | -1.869282485 | 0.698970004 | 0.022366361 | 0.997357711 | 0.02217746 |

**Table S3. Gene Ontology Analysis of Cellular Components**

| TermID     | Name                                                 | Value        | LogSize     | Frequency   | Uniqueness  | Dispensability |
|------------|------------------------------------------------------|--------------|-------------|-------------|-------------|----------------|
| GO:0001750 | photoreceptor outer segment                          | -2.184273475 | 1.982271233 | 0.500869932 | 0.742068051 | 0.61554079     |
| GO:0097731 | 9+0 non-motile cilium                                | -1.519499569 | 2.123851641 | 0.69594559  | 0.739012056 | 0.91042366     |
| GO:0097733 | photoreceptor cell cilium                            | -2.075473606 | 2.08278537  | 0.632677809 | 0.736895503 | 0.95237439     |
| GO:0005581 | collagen trimer                                      | -2.541867573 | 1.944482672 | 0.458691411 | 0.955601301 | 0.14408318     |
| GO:0005593 | FACIT collagen trimer                                | -1.518123523 | 0.84509804  | 0.03163389  | 0.963289827 | 0.116296       |
| GO:0005775 | vacuolar lumen                                       | -1.446463182 | 2.250420002 | 0.933199768 | 0.957281163 | 0.19342038     |
| GO:0005788 | endoplasmic reticulum lumen                          | -2.673426223 | 2.496929648 | 1.650234618 | 0.962427925 | 0.03754327     |
| GO:0005856 | cytoskeleton                                         | -3.484623284 | 3.390228362 | 12.94353351 | 0.931126902 | 0.27063211     |
| GO:0005886 | plasma membrane                                      | -8.599483654 | 3.779235632 | 31.70770285 | 0.86549684  | 0.30233725     |
| GO:0005903 | brush border                                         | -1.596810054 | 2.037426498 | 0.569410028 | 0.945307609 | 0.00001369     |
| GO:0031526 | brush border membrane                                | -1.463958676 | 1.785329835 | 0.316338904 | 0.671380679 | 0.85319062     |
| GO:0032421 | stereocilium bundle                                  | -1.445104997 | 1.851258349 | 0.369062055 | 0.946330543 | 0.86540199     |
| GO:0005911 | cell-cell junction                                   | -1.603073827 | 2.720159303 | 2.762693099 | 0.968401114 | 0.00001674     |
| GO:0005929 | cilium                                               | -4.480035599 | 2.896526217 | 4.149311963 | 0.765832162 | 0.51698242     |
| GO:0005930 | axoneme                                              | -5.940748005 | 2.276461804 | 0.991195234 | 0.671164652 | 0.00001463     |
| GO:0005858 | axonemal dynein complex                              | -3.46048051  | 1.361727836 | 0.115990932 | 0.68542383  | 0.80235877     |
| GO:0031514 | motile cilium                                        | -2.116134263 | 2.501059262 | 1.666051563 | 0.736047889 | 0.70048972     |
| GO:0032838 | plasma membrane bounded cell projection<br>cytoplasm | -2.399467065 | 2.442479769 | 1.45515896  | 0.747449952 | 0.91412933     |
| GO:0097014 | ciliary plasm                                        | -6.203315632 | 2.278753601 | 0.996467549 | 0.718364601 | 0.9039632      |
| GO:0005938 | cell cortex                                          | -2.100825945 | 2.509202522 | 1.697685454 | 0.897049502 | 0.18573633     |
| GO:0009925 | basal plasma membrane                                | -1.338338934 | 2.475671188 | 1.571149892 | 0.845840331 | 0.60862576     |
| GO:0015630 | microtubule cytoskeleton                             | -1.442903606 | 3.1532049   | 7.497232035 | 0.908725314 | 0.49410692     |
| GO:0016020 | membrane                                             | -2.392497745 | 3.990383259 | 51.56324142 | 0.999952202 | 0.00006858     |
| GO:0016324 | apical plasma membrane                               | -2.89720602  | 2.610660163 | 2.145832235 | 0.840884942 | 0.63292158     |
| GO:0016342 | catenin complex                                      | -1.599856756 | 1.505149978 | 0.163441767 | 0.879574061 | 0.14198099     |

|            |                                           |              |             |             |             |            |
|------------|-------------------------------------------|--------------|-------------|-------------|-------------|------------|
| GO:0016459 | myosin complex                            | -1.802699586 | 1.770852012 | 0.305794274 | 0.898914997 | 0.34216247 |
| GO:0030018 | Z disc                                    | -2.366614189 | 2.123851641 | 0.69594559  | 0.856971374 | 0.18807035 |
| GO:0031674 | I band                                    | -1.5771928   | 2.167317335 | 0.769758001 | 0.855722794 | 0.89875637 |
| GO:0030286 | dynein complex                            | -1.579164158 | 1.740362689 | 0.284705014 | 0.885158386 | 0.33982839 |
| GO:0030312 | external encapsulating structure          | -9.041061948 | 2.751279104 | 2.968313386 | 0.904317315 | 0.20048537 |
| GO:0031012 | extracellular matrix                      | -8.802099674 | 2.750508395 | 2.963041071 | 0.8333354   | 0          |
| GO:0005604 | basement membrane                         | -6.78383266  | 1.968482949 | 0.485052987 | 0.855774439 | 0.77145604 |
| GO:0062023 | collagen-containing extracellular matrix  | -7.439151607 | 2.632457292 | 2.256550851 | 0.837505217 | 0.93369127 |
| GO:0031253 | cell projection membrane                  | -4.869158017 | 2.556302501 | 1.892761111 | 0.672243061 | 0.43072259 |
| GO:0031256 | leading edge membrane                     | -3.794913405 | 2.264817823 | 0.964833658 | 0.866584907 | 0.17287431 |
| GO:0001726 | ruffle                                    | -1.356575685 | 2.269512944 | 0.975378289 | 0.770581646 | 0.7978267  |
| GO:0032587 | ruffle membrane                           | -1.904936967 | 2.012837225 | 0.537776138 | 0.677040529 | 0.7496825  |
| GO:0031965 | nuclear membrane                          | -1.343623918 | 2.498310554 | 1.655506933 | 0.949792825 | 0.24833833 |
| GO:0032982 | myosin filament                           | -1.687007661 | 1.397940009 | 0.126535562 | 0.925393386 | 0.467013   |
| GO:0036457 | keratohyalin granule                      | -1.316262924 | 0.698970004 | 0.02108926  | 0.990451134 | 0.02357318 |
| GO:0042734 | presynaptic membrane                      | -1.539604656 | 2.269512944 | 0.975378289 | 0.825961812 | 0.57487597 |
| GO:0042995 | cell projection                           | -5.957684679 | 3.385963571 | 12.81699794 | 0.999963784 | 0.00003805 |
| GO:0043194 | axon initial segment                      | -1.553195313 | 1.380211242 | 0.121263247 | 0.831530724 | 0.32625139 |
| GO:0043202 | lysosomal lumen                           | -1.479166727 | 1.995635195 | 0.516686877 | 0.958730525 | 0.59218867 |
| GO:0043235 | receptor complex                          | -1.611115026 | 2.736396502 | 2.8681394   | 0.948674933 | 0.18045683 |
| GO:0043256 | laminin complex                           | -1.583525697 | 1           | 0.047450836 | 0.850457729 | 0.61094143 |
| GO:0045177 | apical part of cell                       | -3.357501487 | 2.675778342 | 2.49380503  | 0.999971768 | 0.0000165  |
| GO:0045178 | basal part of cell                        | -1.977625983 | 2.50242712  | 1.671323878 | 0.999973193 | 0.00001563 |
| GO:0070161 | anchoring junction                        | -1.380616683 | 2.961421094 | 4.818895977 | 0.967384595 | 0.54638508 |
| GO:0071944 | cell periphery                            | -9.628113635 | 3.812378511 | 34.22259714 | 0.999956216 | 0.00002591 |
| GO:0097730 | non-motile cilium                         | -2.601915924 | 2.23299611  | 0.896293563 | 0.75113799  | 0.65393816 |
| GO:0098590 | plasma membrane region                    | -5.727773781 | 3.124178055 | 7.012179048 | 0.884694976 | 0.37062327 |
| GO:0098636 | protein complex involved in cell adhesion | -4.814215103 | 1.763427994 | 0.300521959 | 0.957000787 | 0          |

|            |                                                  |              |             |             |             |            |
|------------|--------------------------------------------------|--------------|-------------|-------------|-------------|------------|
| GO:0098637 | protein complex involved in cell-matrix adhesion | -2.664501896 | 1.255272505 | 0.089629356 | 0.937291118 | 0.12574007 |
| GO:0008305 | integrin complex                                 | -1.683268868 | 1.505149978 | 0.163441767 | 0.857270319 | 0.86200336 |
| GO:0098644 | complex of collagen trimers                      | -1.652831678 | 1.342422681 | 0.110718617 | 0.808508218 | 0.66107751 |
| GO:0098858 | actin-based cell projection                      | -2.051277838 | 2.372912003 | 1.238994042 | 0.799472709 | 0.4422221  |
| GO:0098862 | cluster of actin-based cell projections          | -3.618651528 | 2.238046103 | 0.906838193 | 0.999975105 | 0.00001447 |
| GO:0099080 | supramolecular complex                           | -1.966070452 | 3.159867847 | 7.613222966 | 0.999966798 | 0.00003261 |
| GO:0099512 | supramolecular fiber                             | -3.047142256 | 3.027757205 | 5.615015553 | 0.897082704 | 0.69061366 |
| GO:0099081 | supramolecular polymer                           | -3.119139436 | 3.031004281 | 5.657194074 | 0.904333426 | 0.82727216 |
| GO:0099568 | cytoplasmic region                               | -3.430845464 | 2.495544338 | 1.644962303 | 0.986053086 | 0.0353489  |
| GO:0120025 | plasma membrane bounded cell projection          | -5.337863931 | 3.364175633 | 12.18959245 | 0.749281828 | 0.677567   |

**Table S4. Gene Ontology Analysis of Molecular Function**

| TermID     | Name                                                         | Value        | LogSize     | Frequency   | Uniqueness  | Dispensability | Representative |
|------------|--------------------------------------------------------------|--------------|-------------|-------------|-------------|----------------|----------------|
| GO:0003774 | cytoskeletal motor activity                                  | -3.234901786 | 2.06069784  | 0.623461854 | 1           | 0              | null           |
| GO:0004114 | 3',5'-cyclic-nucleotide phosphodiesterase activity           | -1.304485866 | 1.397940009 | 0.131255127 | 0.916857687 | 0.56171572     | null           |
| GO:0004713 | protein tyrosine kinase activity                             | -4.289774188 | 2.155336037 | 0.776592836 | 0.89038478  | 0              | null           |
| GO:0004714 | transmembrane receptor protein tyrosine kinase activity      | -2.203139406 | 1.799340549 | 0.339075745 | 0.884673313 | 0.63410145     | null           |
| GO:0005001 | transmembrane receptor protein tyrosine phosphatase activity | -1.390926182 | 1.255272505 | 0.092972382 | 0.876290933 | 0.30254953     | null           |
| GO:0005044 | scavenger receptor activity                                  | -3.35727492  | 1.447158031 | 0.147662018 | 0.887855762 | 0.40206486     | null           |
| GO:0005085 | guanyl-nucleotide exchange factor activity                   | -5.302322515 | 2.369215857 | 1.274268526 | 0.919007178 | 0              | null           |
| GO:0030695 | GTPase regulator activity                                    | -2.023605947 | 2.697229343 | 2.718074925 | 0.915606512 | 0.88032971     | 5085           |
| GO:0005201 | extracellular matrix structural constituent                  | -6.824521927 | 2.222716471 | 0.907847963 | 0.968940344 | 0              | null           |
| GO:0005319 | lipid transporter activity                                   | -3.615671904 | 2.247973266 | 0.962537599 | 0.77220653  | 0.24713561     | null           |
| GO:0005509 | calcium ion binding                                          | -7.941475245 | 2.854913022 | 3.910308996 | 0.958019326 | 0              | null           |
| GO:0005515 | protein binding                                              | -2.615361724 | 4.15730563  | 78.5561936  | 0.996800331 | 0.00553101     | null           |
| GO:0005543 | phospholipid binding                                         | -2.07588534  | 2.693726949 | 2.69619907  | 0.998231138 | 0.0026566      | null           |
| GO:0008092 | cytoskeletal protein binding                                 | -1.394057851 | 2.999565488 | 5.458025704 | 0.995210906 | 0.01616627     | null           |
| GO:0008289 | lipid binding                                                | -2.018271727 | 2.937517892 | 4.730653541 | 0.998070422 | 0.00289395     | null           |
| GO:0008569 | minus-end-directed microtubule motor activity                | -4.872890428 | 1.255272505 | 0.092972382 | 0.947906038 | 0              | null           |
| GO:0015081 | sodium ion transmembrane transporter activity                | -2.177335873 | 2.220108088 | 0.902378999 | 0.775730599 | 0.65280214     | null           |
| GO:0019198 | transmembrane receptor protein phosphatase activity          | -1.390926182 | 1.255272505 | 0.092972382 | 0.876290933 | 0.65544163     | null           |



|            |                                                                         |              |             |             |             |            |       |
|------------|-------------------------------------------------------------------------|--------------|-------------|-------------|-------------|------------|-------|
| GO:0019199 | transmembrane receptor protein kinase activity                          | -2.755483642 | 1.913813852 | 0.442986054 | 0.882790726 | 0.65059441 | null  |
| GO:0019838 | growth factor binding                                                   | -2.309258675 | 2.133538908 | 0.73831009  | 0.996126902 | 0.00929284 | null  |
| GO:0022804 | active transmembrane transporter activity                               | -1.391987107 | 2.664641976 | 2.521192234 | 0.773105442 | 0.60186305 | null  |
| GO:0030020 | extracellular matrix structural constituent conferring tensile strength | -4.363909069 | 1.662757832 | 0.246103363 | 0.968940344 | 0.56348372 | null  |
| GO:0032559 | adenyl ribonucleotide binding                                           | -2.510220676 | 3.184123354 | 8.351107465 | 0.872069789 | 0.42035653 | null  |
| GO:0005524 | ATP binding                                                             | -1.92740793  | 3.172018809 | 8.121410993 | 0.871863375 | 0.88389617 | 32559 |
| GO:0030554 | adenyl nucleotide binding                                               | -2.289314191 | 3.210586025 | 8.876127974 | 0.897914007 | 0.80926684 | 32559 |
| GO:0034040 | ATPase-coupled lipid transmembrane transporter activity                 | -1.594088128 | 1           | 0.049220673 | 0.782500583 | 0.62817762 | null  |
| GO:0038024 | cargo receptor activity                                                 | -5.474017228 | 1.86923172  | 0.399234345 | 0.879837209 | 0          | null  |
| GO:0042910 | xenobiotic transmembrane transporter activity                           | -1.346592154 | 1.51851394  | 0.175006836 | 0.815313018 | 0.45578888 | null  |
| GO:0043394 | proteoglycan binding                                                    | -2.75548454  | 1.568201724 | 0.196882691 | 0.950793307 | 0.0019226  | null  |
| GO:0048407 | platelet-derived growth factor binding                                  | -1.527144937 | 1.079181246 | 0.0601586   | 0.959317378 | 0.69138971 | null  |
| GO:0050431 | transforming growth factor beta binding                                 | -2.502838292 | 1.380211242 | 0.125786164 | 0.959126744 | 0.00801879 | null  |
| GO:0050839 | cell adhesion molecule binding                                          | -1.368543615 | 2.745074792 | 3.035274815 | 0.995512397 | 0.01231781 | null  |
| GO:0060589 | nucleoside-triphosphatase regulator activity                            | -2.023605947 | 2.697229343 | 2.718074925 | 0.93012354  | 0.60831995 | null  |
| GO:0099604 | ligand-gated calcium channel activity                                   | -2.209765412 | 1.51851394  | 0.175006836 | 0.789223332 | 0.45578888 | null  |
| GO:0099094 | ligand-gated monoatomic cation channel activity                         | -1.486434092 | 2.139879086 | 0.749248018 | 0.770758026 | 0.80794097 | 99604 |

|            |                                                         |              |             |             |             |            |      |
|------------|---------------------------------------------------------|--------------|-------------|-------------|-------------|------------|------|
| GO:0140326 | ATPase-coupled intramembrane lipid transporter activity | -2.70371473  | 1.447158031 | 0.147662018 | 0.770930121 | 0.69000916 | null |
| GO:0140657 | ATP-dependent activity                                  | -2.337930061 | 2.767897616 | 3.199343724 | 1           | 0          | null |

Tables S2 to S4 display data from analysis with REVIGO (<http://revigo.irb.ht>). Raw data are displayed. Value,  $-\log_{10}$  (p-value); LogSize,  $\log_{10}$  (number of annotations for GO term ID in *H. sapiens* in the EBI GOA database); Frequency, proportion of the GO term in the underlying (*H. sapiens*) protein annotation database; Uniqueness, measures whether the term is an outlier when compared semantically to the whole list; Dispensability, semantic similarity threshold at which the term was removed from the list and assigned to a cluster.

**Figure S1. Definition of Responders and Non-responders.**

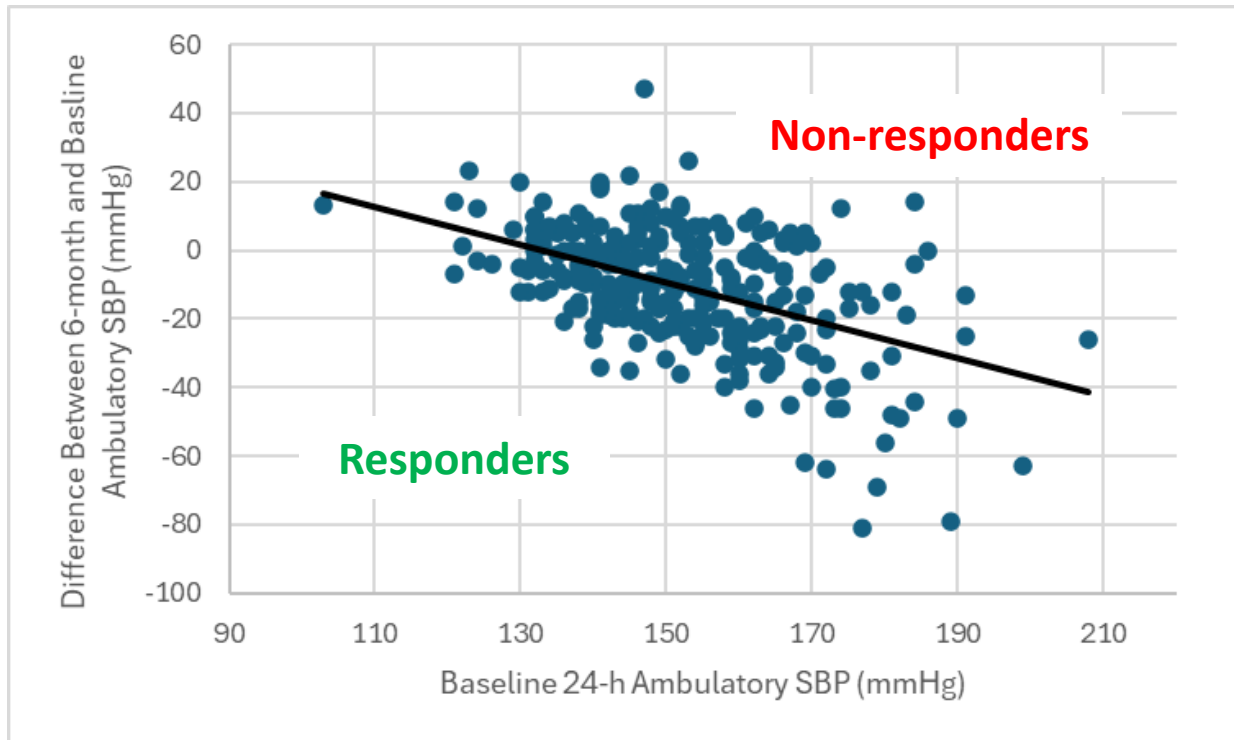

Change in 24-h ambulatory systolic blood pressure (SBP) between baseline visit and 6-month follow-up (y-axis) is plotted against baseline 24-h ambulatory SBP (x-axis). Linear regression was applied and the regression line (black) is shown. Responders are those whose change in 24-h ambulatory SBP was greater than the mean response indicated by the regression line. Non-responders are those whose change in 24-h ambulatory SBP was smaller than the mean response indicated by the regression line.

**Figure S2. Sequencing data analysis pipeline.**

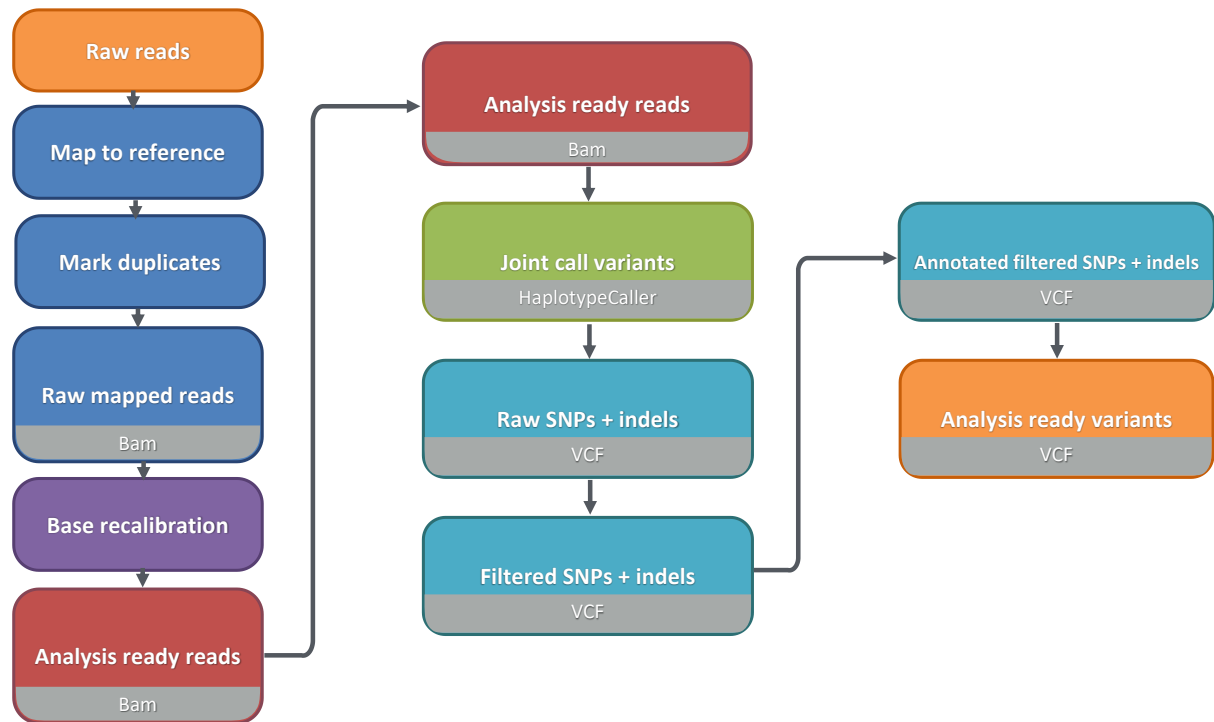

Abbreviations: VCF, Variant Call Format. Bam, compressed binary version of SAM as described in <https://samtools.github.io/hts-specs/SAMv1.pdf>. Details on HaplotypeCaller can be found on <https://gatk.broadinstitute.org/hc/en-us/articles/360037225632-HaplotypeCaller>.

**Figure S3. Exome Genome Sequencing Coverage.**

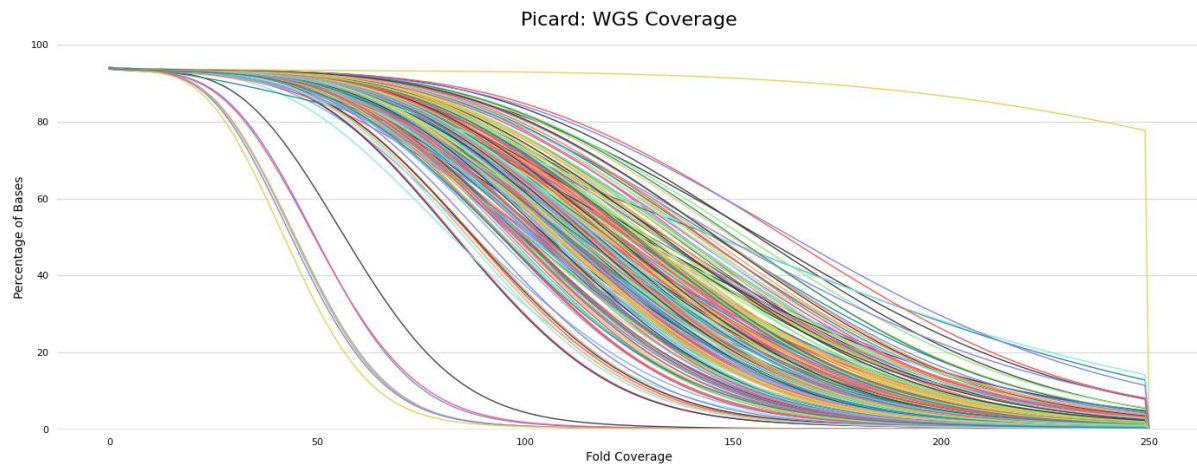

Analysis was conducted using the CollectRawWgsMetrics (Picard) tool as described on <https://gatk.broadinstitute.org/hc/en-us/articles/360040508411-CollectRawWgsMetrics-Picard>. Eight samples have lower coverage (s96, s97, s99, s100, s101, s102, s103 & s105). However, they have a coverage of 30 reads per base for 80% of the exome.

**Figure S4. Post-hoc Power Analysis.**

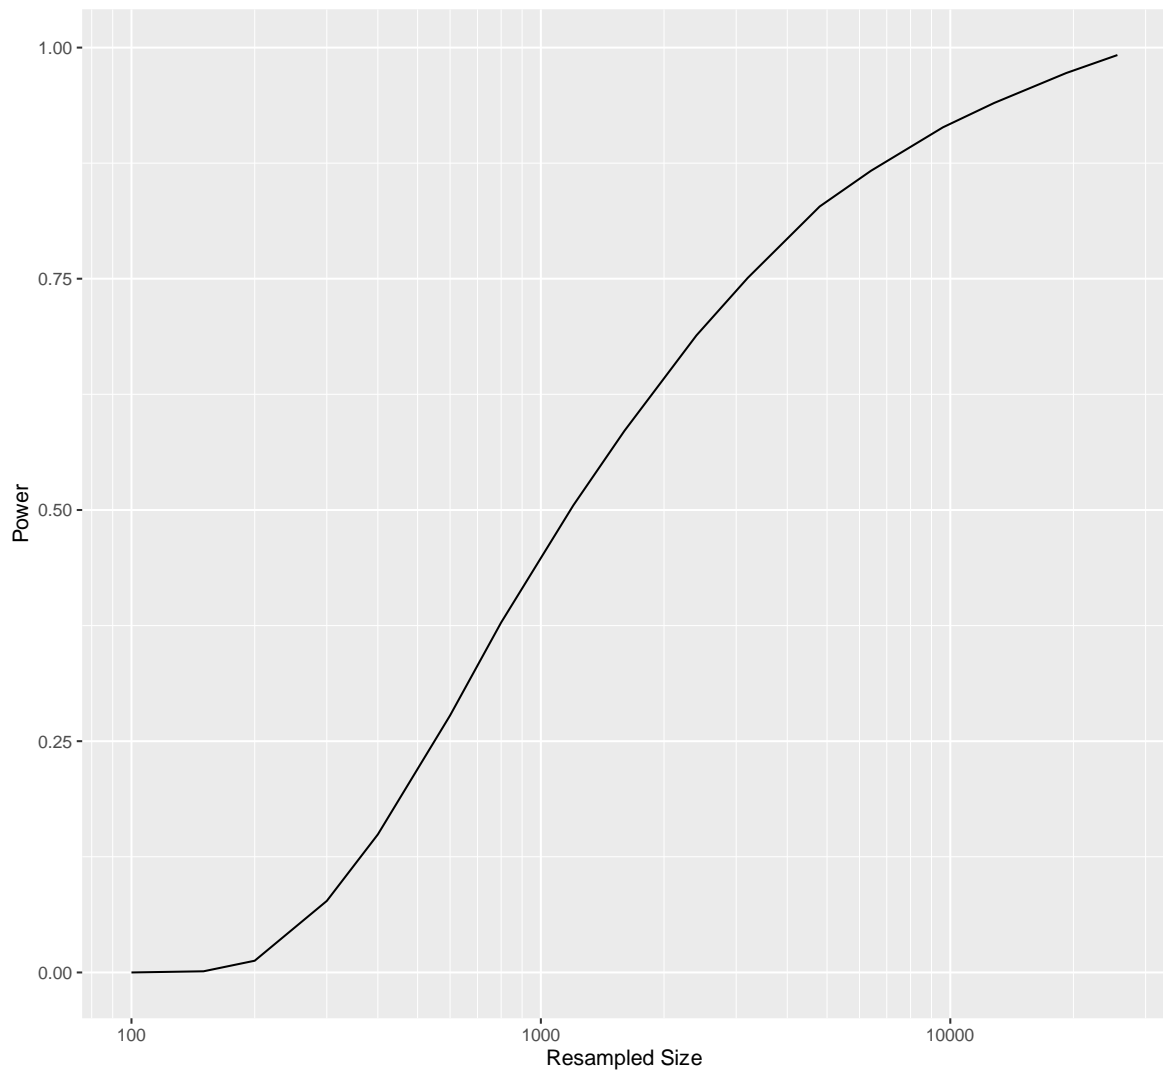

A post-hoc power analysis was conducted by treating the results as a pilot study and resampling the data with replacement, with resample sizes between 100 and 25600. The analysis indicates that given the effects from the measured data, a total sample size of 4219 would be needed for a power of 0.8.

**Figure S5. Summary of Variant Annotation.**

A

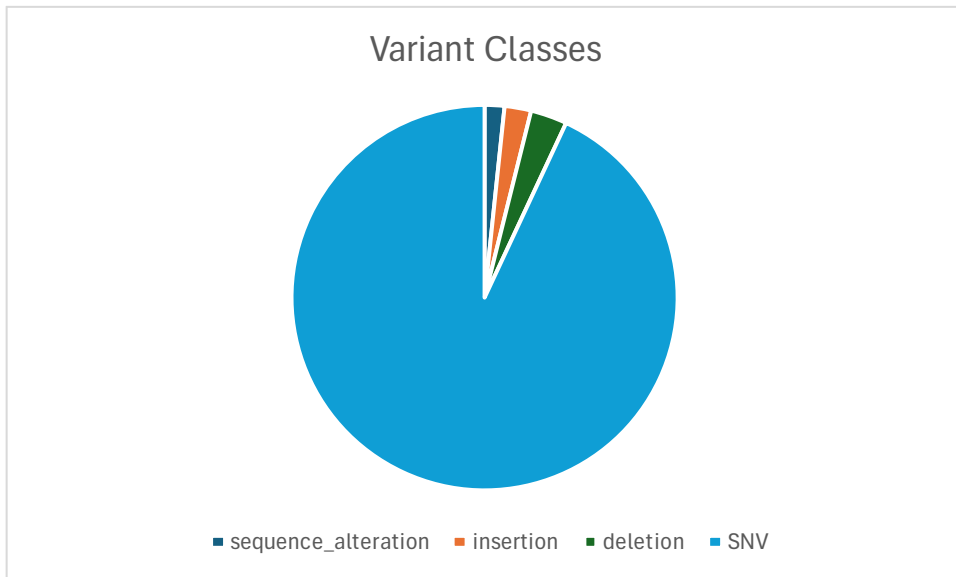

B

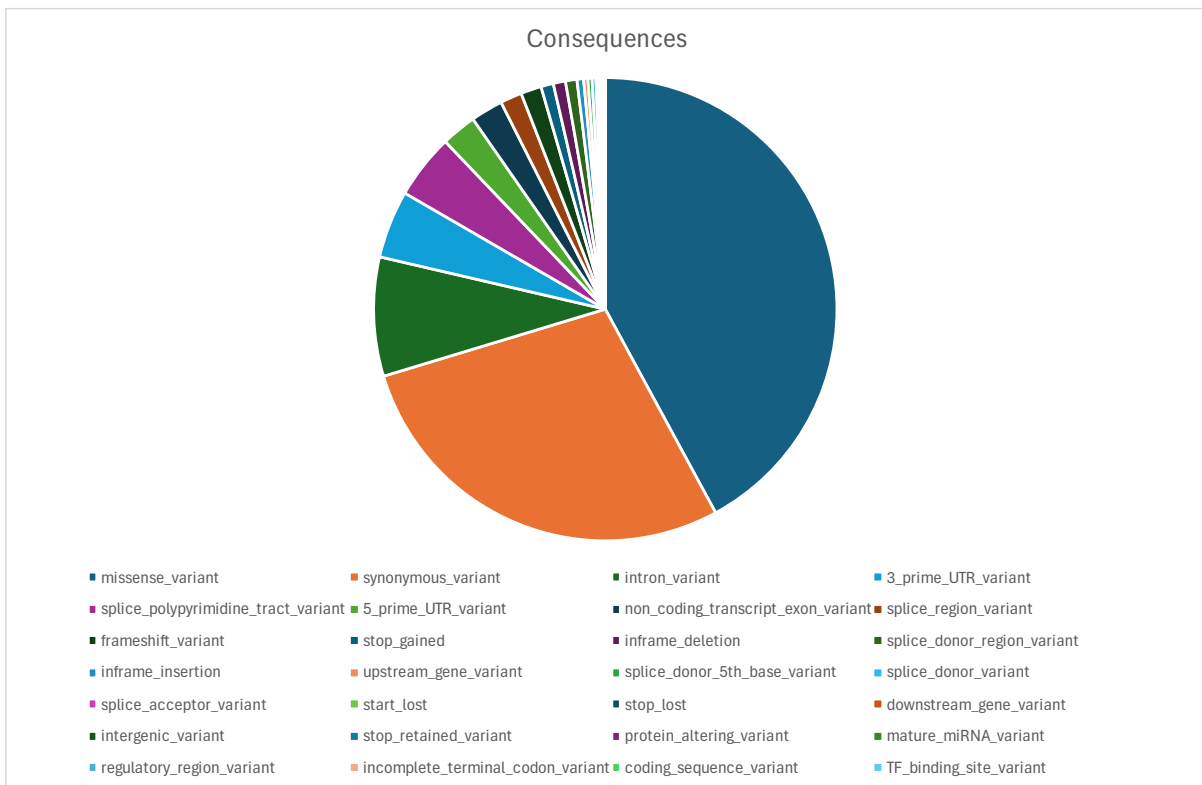

Analysis was conducted using Variant Effect Predictor <sup>1</sup>. A total of 249,669 variants were processed. There were 30,544 overlapped genes, 175,568 overlapped transcripts and 32,153 overlapped regulatory features. A, Pie chart summarising the variant classes identified in the analysis. B, Pie chart summarising the predicted consequences for the variants identified in the analysis.



**Figure S6. Sensitivity Analysis. PCA Scatter plot Matrix.**

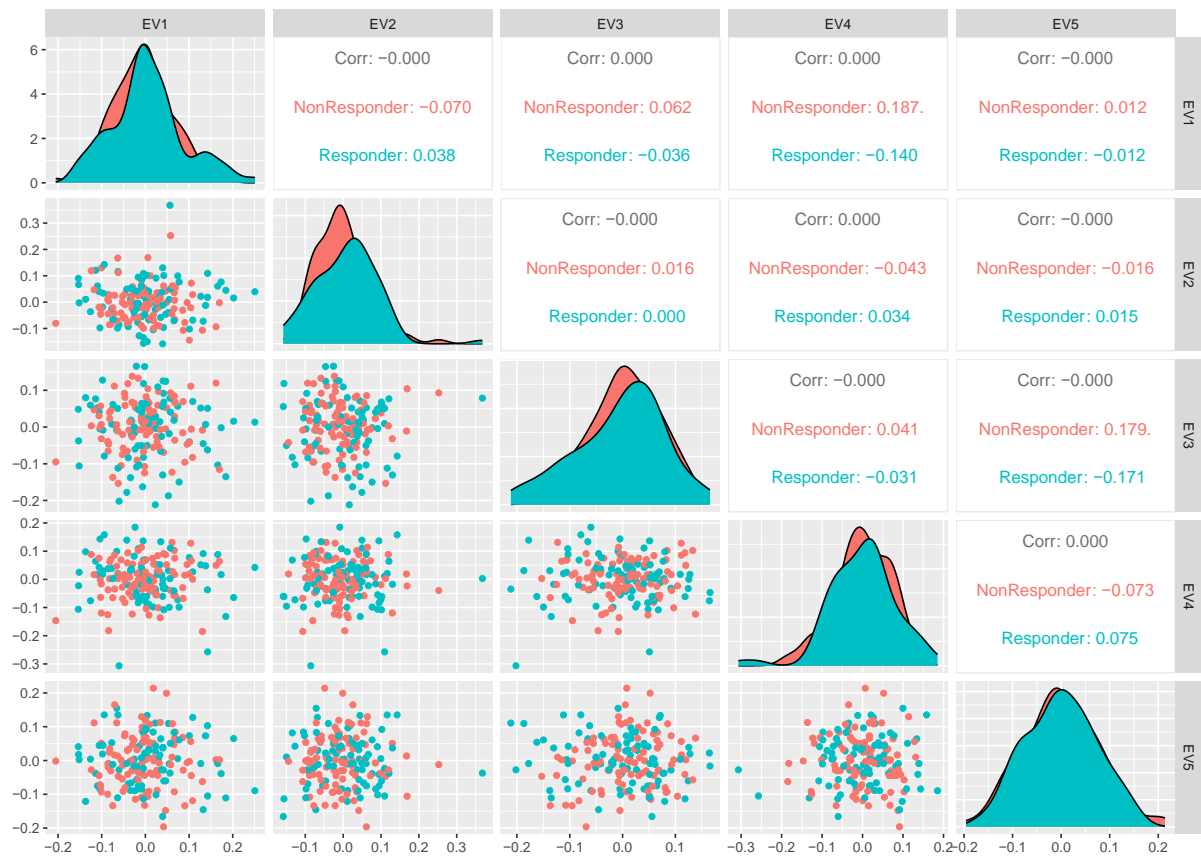

A sensitivity analysis was conducted with a more stringent definition of response vs non-response to RDN by comparing the top with the bottom tertile of response. Analysis as per Figure 2 in the main paper. The plot shows no separation between the responders and non-responders over these components. Corr, correlation; EV, eigenvector. Axes are unit-less.

**Figure S7. Sensitivity Analysis. Distribution of p-values.**

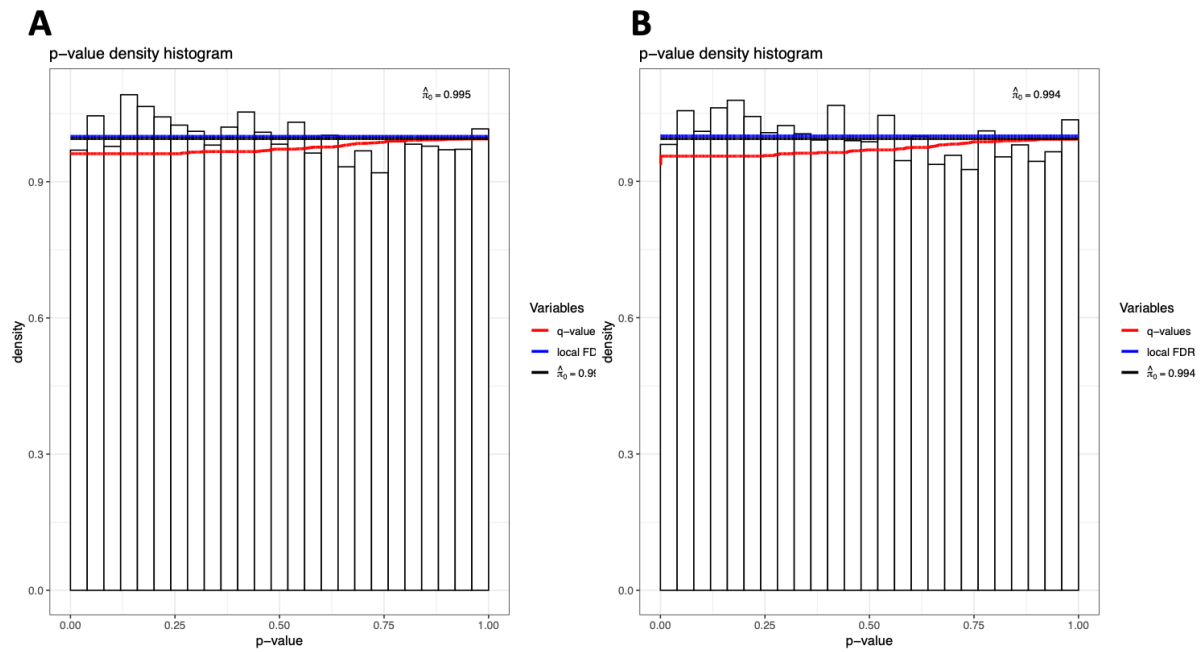

A sensitivity analysis was conducted with a more stringent definition of response vs non-response to RDN by comparing the top with the bottom tertile of response. Analysis as per Figure 3 in the main paper. A, Distribution of p-values in unadjusted data. B, Distribution of p-values in data adjusted for sex. Overall no evidence was found to reject the null hypothesis of no genome-wide association with blood pressure response to renal denervation.
